# Supplementary material for: A reaction based carbazole–indolium conjugate probe for the selective detection of environmentally toxic ions
Source: Royal Society of Chemistry journal article supplement (doi:10.1039/d4ay00301b), 2024-01-01
Supplement: d4ay00301b1.pdf [file d4ay00301b1.pdf]

## Supporting Information

### A reaction based carbazole-Indolium conjugate probe for the selective detection of environmentally toxic ions

| Figure No. | Content                                                       | Page No. |
|------------|---------------------------------------------------------------|----------|
| S1         | $^1\text{H}$ NMR spectrum of <b>CI</b>                        | 2        |
| S2         | $^{13}\text{C}$ NMR spectrum of <b>CI</b>                     | 3        |
| S3         | HRMS spectrum of <b>CI</b>                                    | 4        |
| S4         | B-H plot of sensor with cyanide ion                           | 5        |
| Table S1   | Comparison table of <b>CI</b> with other reported literature  | 6        |
| S5         | $^1\text{H}$ NMR spectrum of <b>CI</b> + $\text{CN}^-$ adduct | 7        |
| S6         | HRMS spectrum of <b>CI</b> + $\text{CN}^-$ adduct             | 8        |

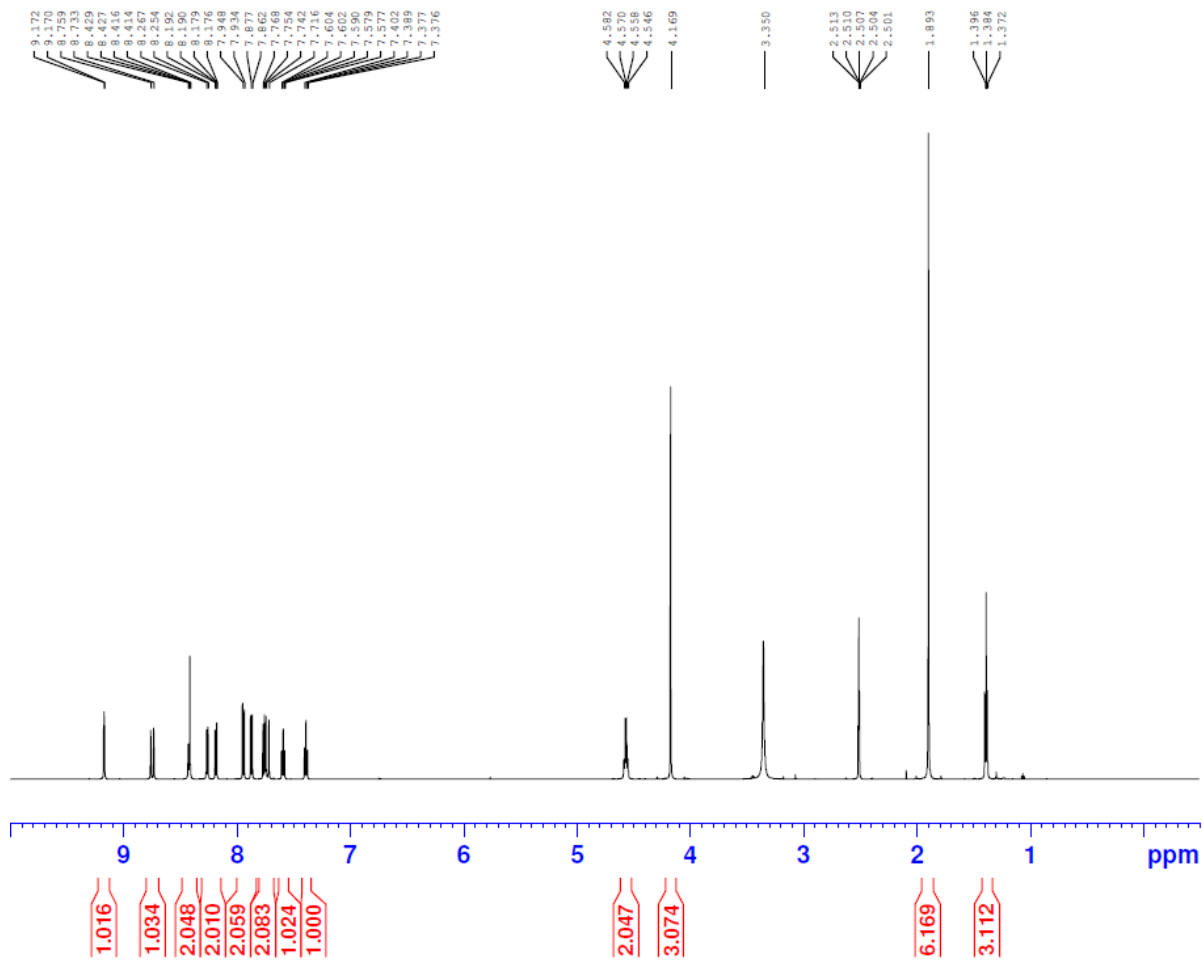

**Fig. S1.**  $^1\text{H}$  NMR spectrum of **CI**

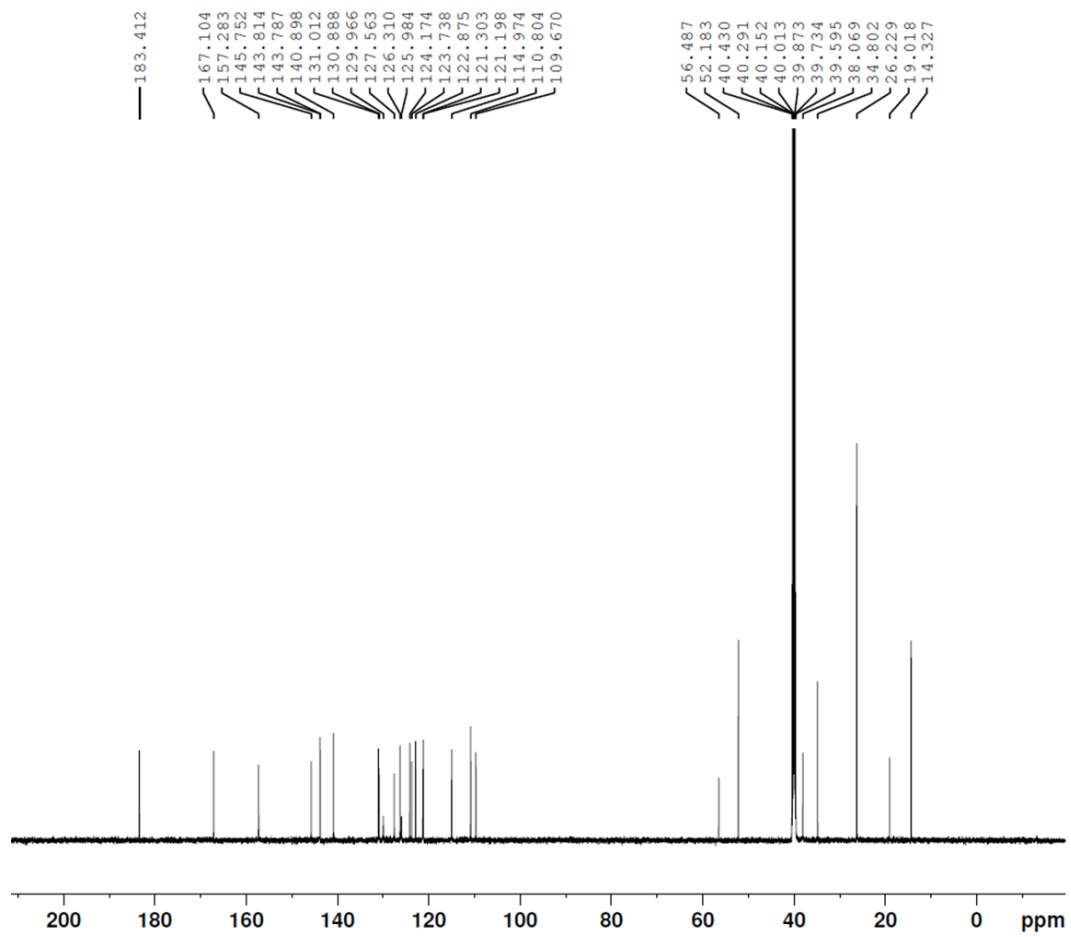

**Fig. S2.**  $^{13}\text{C}$  NMR spectrum of CI

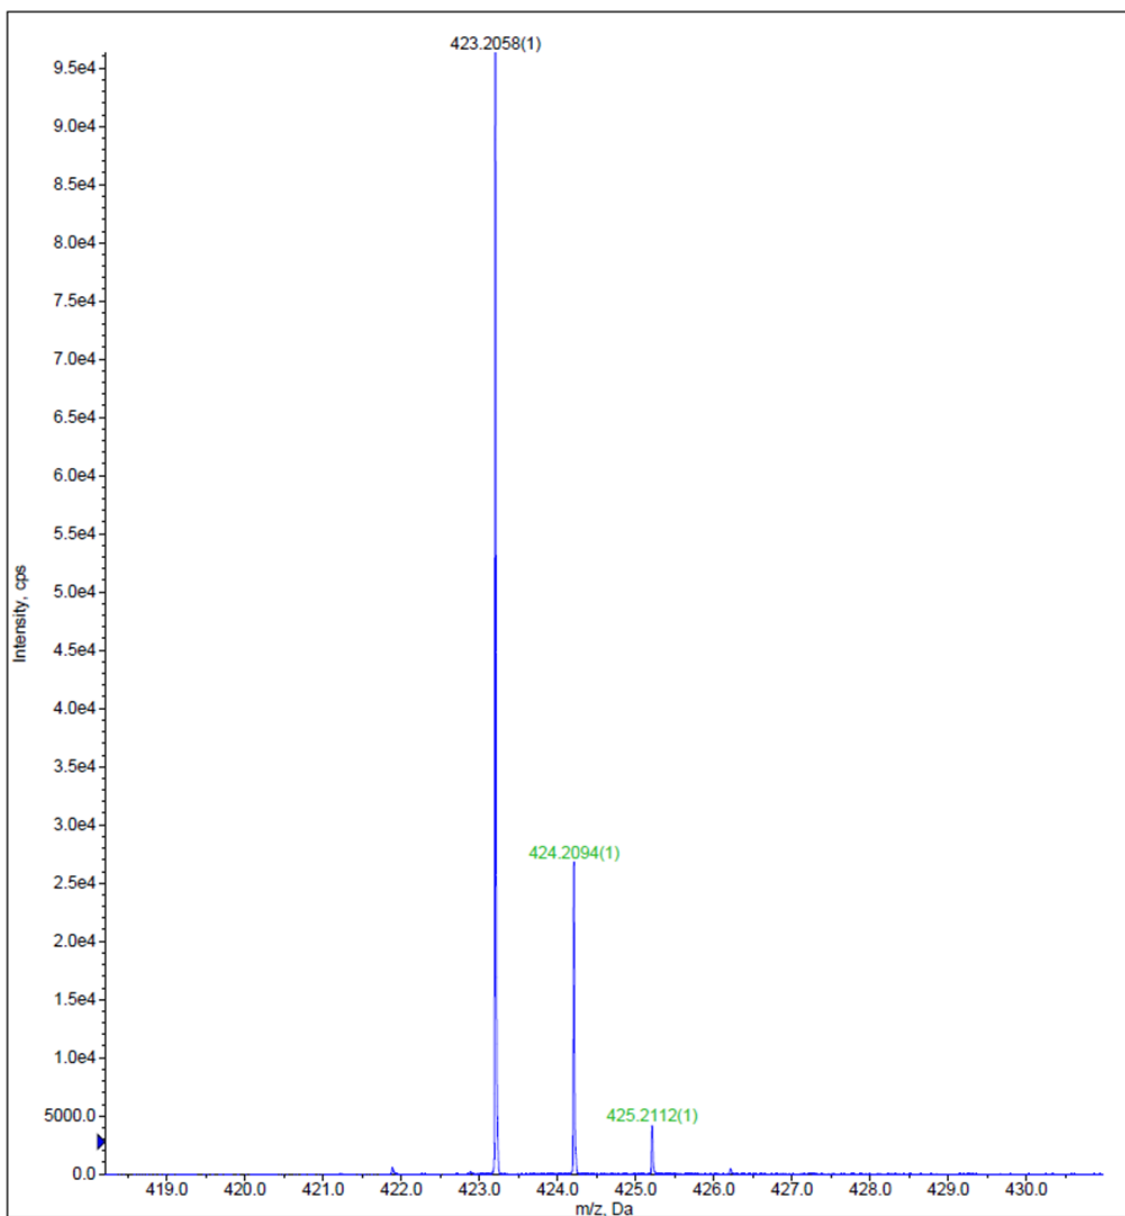

**Fig. S3.** HRMS spectrum of **CI**

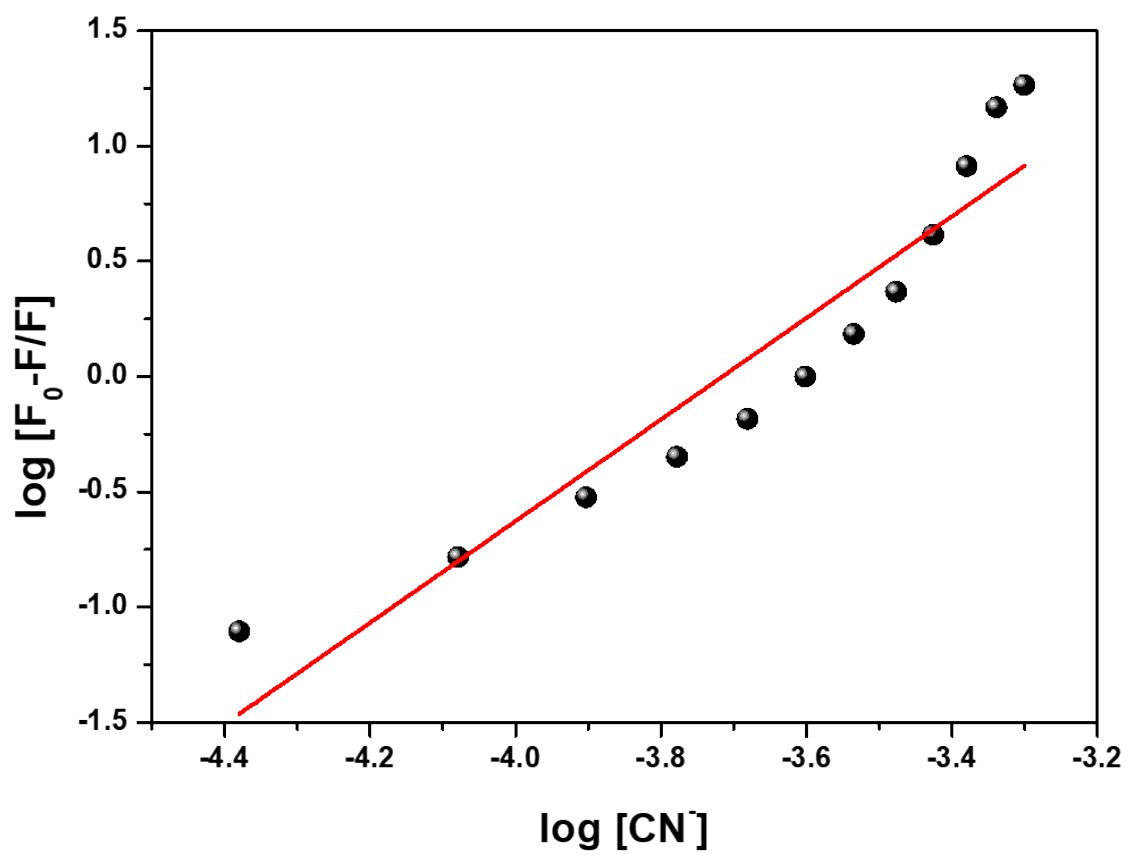

Fig. S4. B-H plot of sensor with cyanide ion

**Table S1.** Comparison of the present work with previously reported work

| <b>S. No</b> | <b>Author's name</b> | <b>Solvent system</b> | <b>Binding constant (M<sup>-1</sup>)</b>       | <b>Detection limit (M)</b>                        | <b>Ref. No.</b> |
|--------------|----------------------|-----------------------|------------------------------------------------|---------------------------------------------------|-----------------|
| 1            | M. S. Sunitha et al. | ACN                   | 3.81x10 <sup>7</sup>                           | 10.39x10 <sup>-5</sup>                            | 10              |
| 2            | S. Malkondu et al.   | 30% aq. DMSO          | 1.99x10 <sup>10</sup>                          | 1.32x10 <sup>-6</sup>                             | 32              |
| 3            | S. B. Roy et al.     | ACN                   | 9.04x10 <sup>2</sup>                           | 0.60x10 <sup>-6</sup>                             | 38              |
| 4            | S. Erdemir et al.    | 10% aq. MeOH          | 1.99x10 <sup>4</sup> &<br>2.45x10 <sup>8</sup> | 0.92 x10 <sup>-6</sup> &<br>0.68x10 <sup>-6</sup> | 39              |
| 5            | M. Gosi et al.       | 80% aq. DMF           | 1.17 x10 <sup>5</sup>                          | 1.80x10 <sup>-8</sup>                             | 40              |
| 6            | Y. Zhuge et al.      | DMSO                  | 2.58x10 <sup>4</sup>                           | 3.82x10 <sup>-6</sup>                             | 41              |
| 7            | M. Sahu et al.       | 33% aq. MeOH          | 4.99x10 <sup>4</sup>                           | 0.89x10 <sup>-6</sup>                             | 42              |
| 8            | J. Hwang et al.      | THF                   | 3.02x10 <sup>4</sup> &<br>4.85x10 <sup>5</sup> | 8.9 x10 <sup>-7</sup> &<br>3.14x10 <sup>-8</sup>  | 43              |
| 9            | B. K. Bakht et al.   | DMF                   | 2x10 <sup>6</sup>                              | 0.7x10 <sup>-6</sup>                              | 44              |
| 10           | P. Jayasudha et al.  | 90% aq. DMSO          | 1.38x10 <sup>8</sup>                           | 0.14x10 <sup>-6</sup>                             | Present work    |

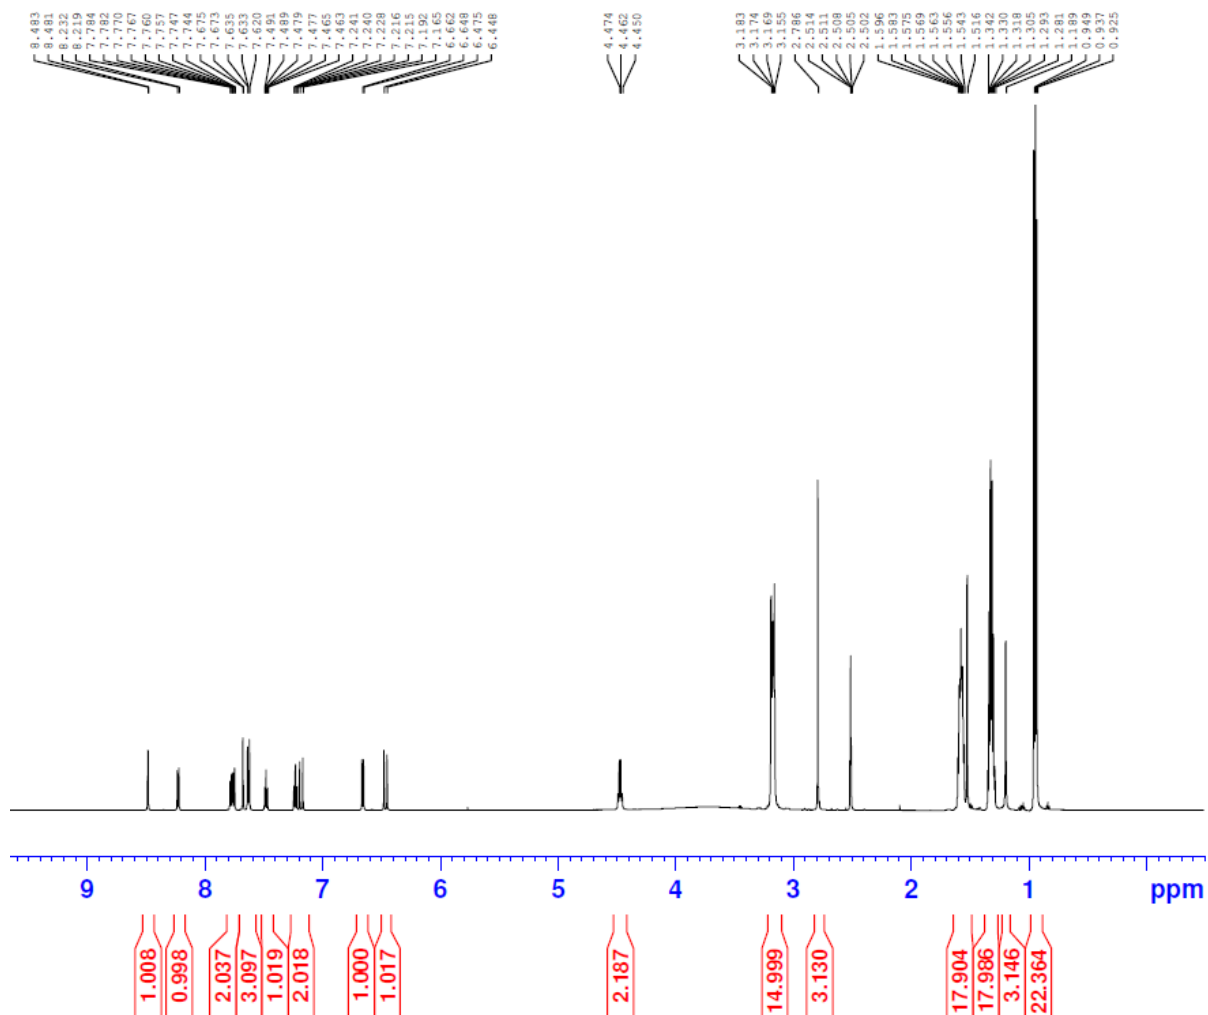

Fig. S5.  $^1\text{H}$  NMR spectrum of  $\text{CI}+\text{CN}^-$  adduct

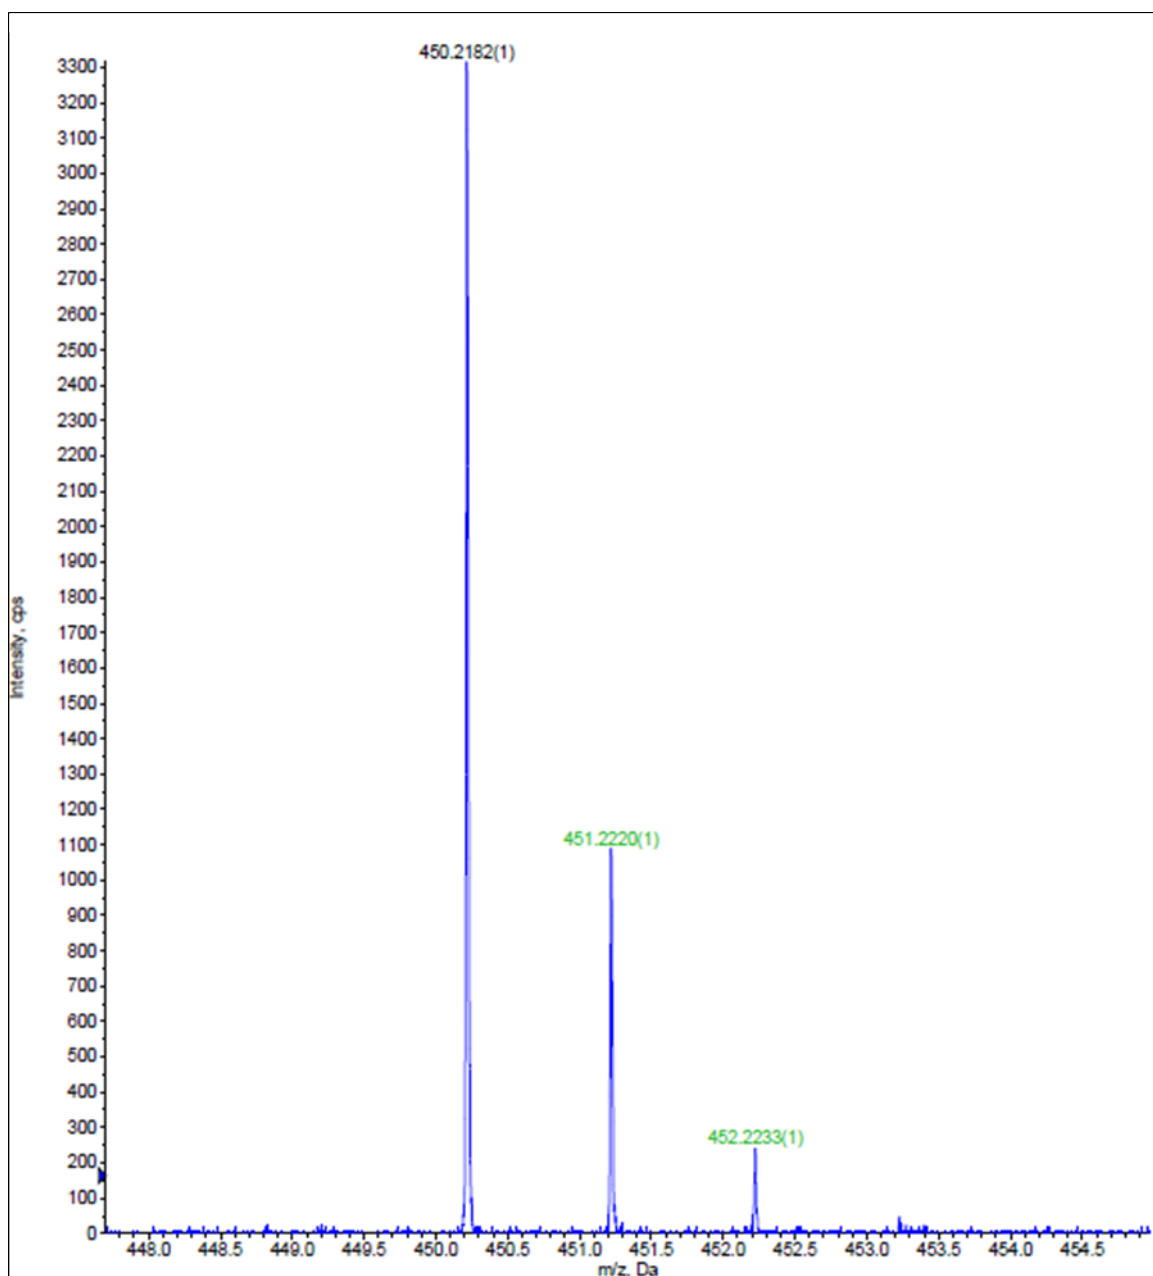

**Fig. S6.** HRMS spectrum of  $\text{CI}+\text{CN}^-$  adduct
